# Supplementary material for: Genome-wide analysis of intraspecific transposon diversity in yeast
Source: PubMed Central journal article supplement (PMC4022208; doi:10.1186/1471-2164-14-399), 2013-06-14

Figure S5.

(A)

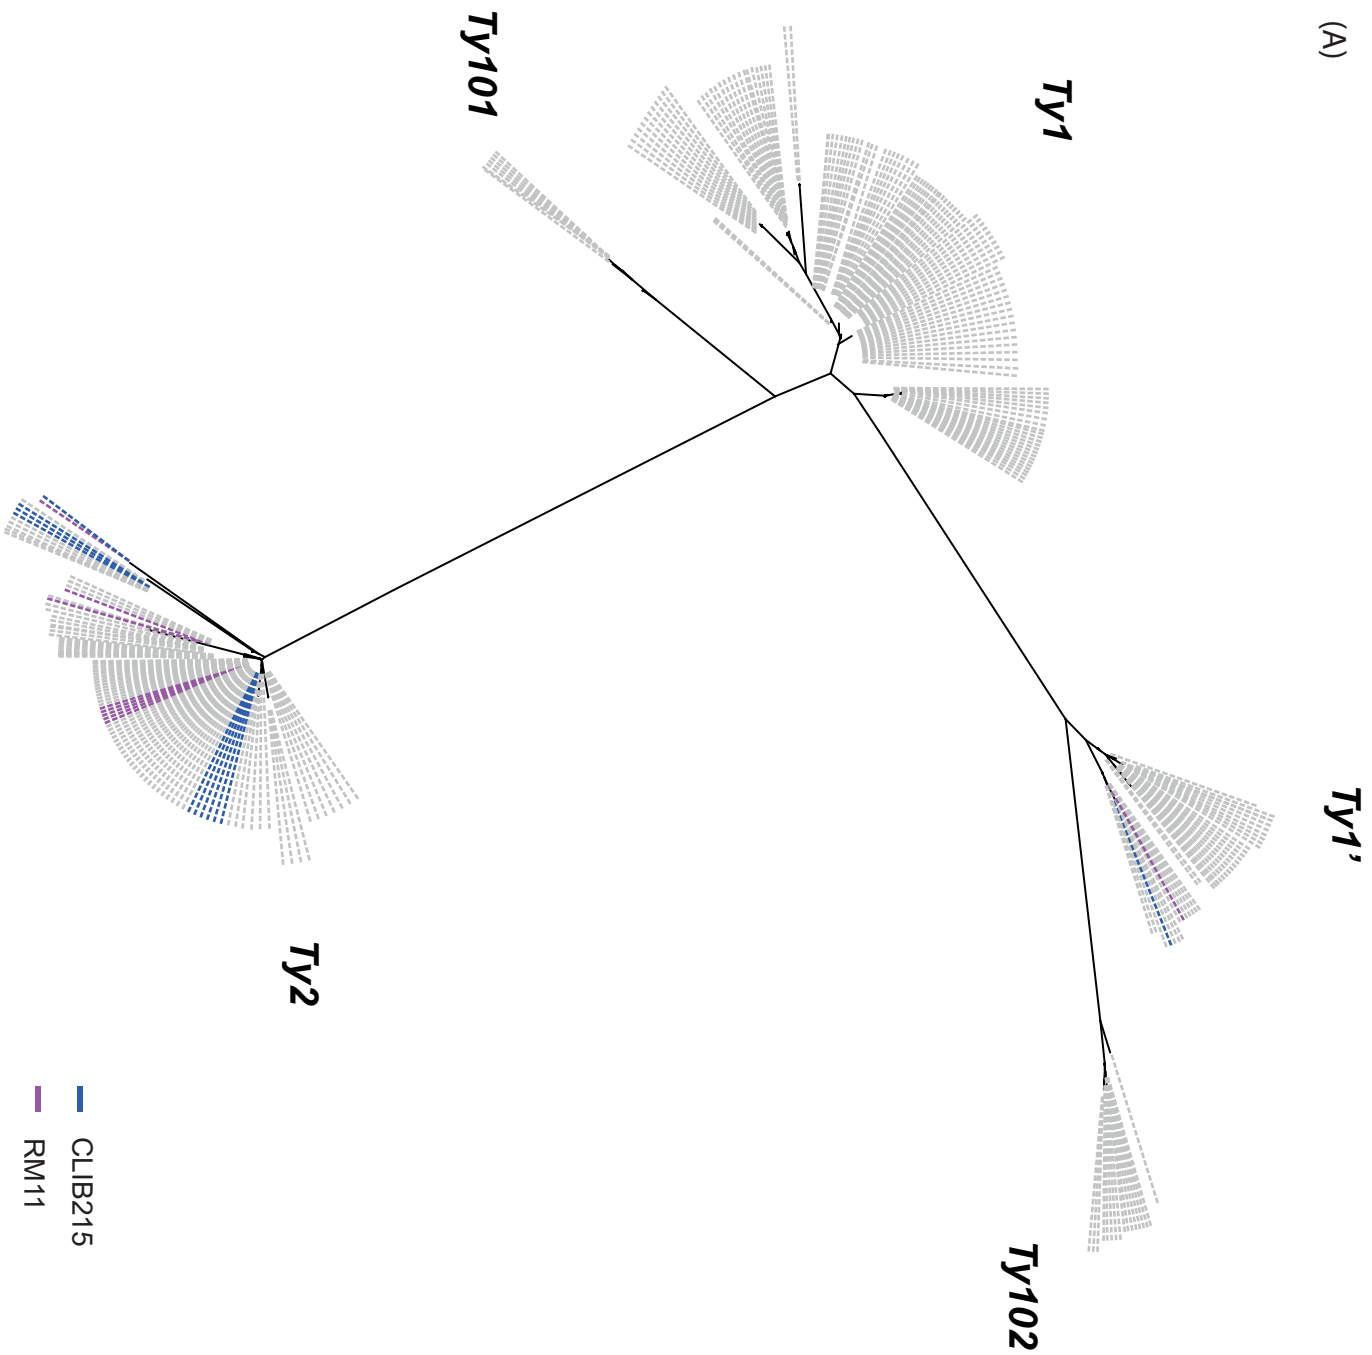

(B)

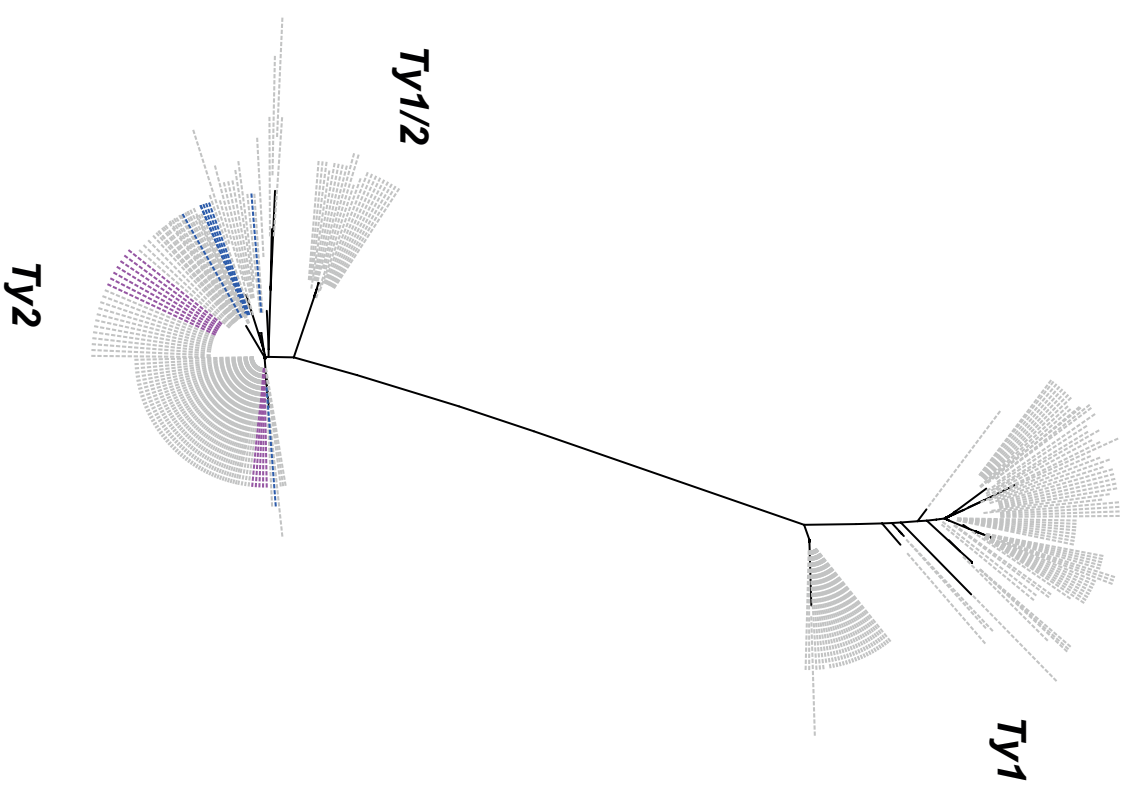

Supplement: 1471-2164-14-399-S11.pdf [file 1471-2164-14-399-S11.pdf]
